# Supplementary material for: Recycling of Li and Co from spent LiCoO2 cathode materials through a low-temperature urea-assisted sulfation roasting approach
Source: Royal Society of Chemistry journal article supplement (doi:10.1039/d4nj02555e), 2024-01-01
Supplement: d4nj02555e1.pdf [file d4nj02555e1.pdf]

## Supplementary Material

### **Recycling of Li, Co from spent LiCoO<sub>2</sub> cathode materials through a low temperature urea-assisted sulfation roasting approach**

Yichuan Kong <sup>a</sup>, Yongzhi Duan <sup>a</sup>, Yuezhi Zhang <sup>a</sup>, Yulin Min <sup>a,b</sup>, Hongxiu Lu <sup>c</sup>,

Penghui Shi <sup>a,b,\*</sup>

<sup>a</sup> Shanghai Key Laboratory of Materials Protection and Advanced Materials in Electric Power, Shanghai University of Electric Power, Shanghai 200090, PR China

<sup>b</sup> Shanghai Institute of Pollution Control and Ecological Security, Shanghai 200090, PR China

<sup>c</sup> Department of Biomedicine and Health, Shanghai Vocational College of Agriculture and Forestry, Shanghai, 201699, PR China

\* Corresponding author. Tel.: +86 18801618059; E-mail addresses: shipenghui@shiep.edu.cn (P. Shi).

**Table S1.** Several representative cases of salt-thermal methods for recycling valuable metal elements from cathode materials by roasting approaches

| Roasting agent                                  | Reaction condition                                                                                                 | Products and recovery efficiency                                                                                                                                              | Ref. |
|-------------------------------------------------|--------------------------------------------------------------------------------------------------------------------|-------------------------------------------------------------------------------------------------------------------------------------------------------------------------------|------|
| NiSO <sub>4</sub>                               | NCM111 : NiSO <sub>4</sub> ·6H <sub>2</sub> O = 2 : 1 (mole ratio), 550 °C, 60 min, air.                           | Li <sub>2</sub> SO <sub>4</sub> , NiO, Ni <sub>0.66</sub> Co <sub>0.66</sub> Mn <sub>0.66</sub> O <sub>3</sub> ; 96.42% for Li, M < 3.62% (M = Ni, Co, and Mn)                | 1    |
| ZnSO <sub>4</sub>                               | LiMn <sub>2</sub> O <sub>4</sub> : ZnSO <sub>4</sub> ·6H <sub>2</sub> O = 1 : 1 (mole ratio), 550 °C, 60 min, air. | Li <sub>2</sub> SO <sub>4</sub> , nano ZnMn <sub>2</sub> O <sub>4</sub> as Li <sup>+</sup> anode<br>832 mA h g <sup>-1</sup> at 90st cycle at 0.1 A g <sup>-1</sup>           | 2    |
| CoSO <sub>4</sub>                               | LiCoO <sub>2</sub> : CoSO <sub>4</sub> ·7H <sub>2</sub> O = 1 : 1 (mole ratio), 550 °C, 60 min, air.               | Li <sub>2</sub> SO <sub>4</sub> , nano-octahedral Co <sub>3</sub> O <sub>4</sub> as Li <sup>+</sup> anode 987.2 mA h g <sup>-1</sup> at 100st cycle at 0.05 A g <sup>-1</sup> | 2    |
| NaHSO <sub>4</sub>                              | LiCoO <sub>2</sub> : NaHSO <sub>4</sub> = 1 : 1.4 (mass ratio) 600 °C, 30 min, air                                 | LiNaSO <sub>4</sub> , Co <sub>3</sub> O <sub>4</sub> 72.56% for Li, 0.53% for Co                                                                                              | 3    |
| (NH <sub>4</sub> ) <sub>2</sub> SO <sub>4</sub> | LiCoO <sub>2</sub> : (NH <sub>4</sub> ) <sub>2</sub> SO <sub>4</sub> = 1 : 2.2 (mole ratio) 600 °C, 45 min, air    | Li <sub>2</sub> Co(SO <sub>4</sub> ) <sub>2</sub> , CoSO <sub>4</sub> ; 99.5% for Li, 8.53% for Co                                                                            | 4    |
| (NH <sub>4</sub> ) <sub>2</sub> SO <sub>4</sub> | LiCoO <sub>2</sub> : (NH <sub>4</sub> ) <sub>2</sub> SO <sub>4</sub> = 1 : 4 (mass ratio) 400 °C, 120 min, Ar      | Li <sub>2</sub> SO <sub>4</sub> , CoSO <sub>4</sub> , Li <sub>2</sub> Co(SO <sub>4</sub> ) <sub>2</sub> ; over 98% for both Li and Co                                         | 5    |

|                                                 |                                                                                                              |                                                                                                                                                       |   |
|-------------------------------------------------|--------------------------------------------------------------------------------------------------------------|-------------------------------------------------------------------------------------------------------------------------------------------------------|---|
| (NH <sub>4</sub> ) <sub>2</sub> SO <sub>4</sub> | NCM622 : (NH <sub>4</sub> ) <sub>2</sub> SO <sub>4</sub> = 1 : 4<br>(mass ratio) 350 °C, 90 min,<br>air      | Li <sub>2</sub> SO <sub>4</sub> , NiSO <sub>4</sub> , CoSO <sub>4</sub> , MnSO <sub>4</sub> ;<br>99.2%, 99.4%, 98.8%, and<br>98.5% for Li, Ni, Co, Mn | 6 |
| Na <sub>2</sub> CO <sub>3</sub>                 | LFP : Na <sub>2</sub> CO <sub>3</sub> : graphite = 1 :<br>1 : 2 (mole ratio), 900 °C, 4 h,<br>N <sub>2</sub> | Fe, NaLi <sub>2</sub> PO <sub>4</sub> , LiNa <sub>5</sub> (PO <sub>4</sub> ) <sub>2</sub> , Li<br>for 96.4%; Fe <sub>3</sub> O <sub>4</sub>           | 7 |

---

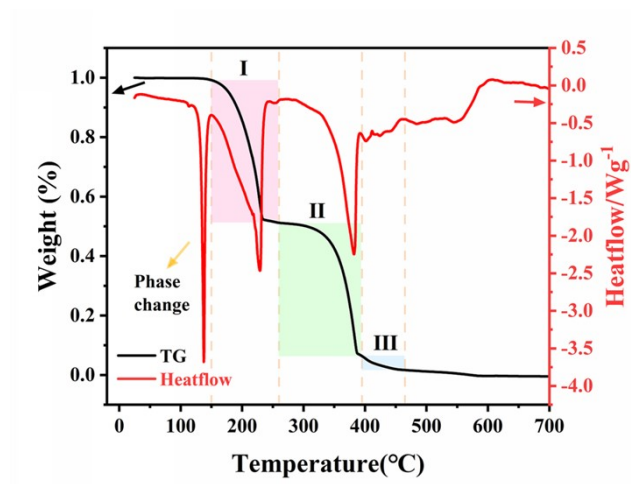

**Fig. S1.** TG curves of pure urea.

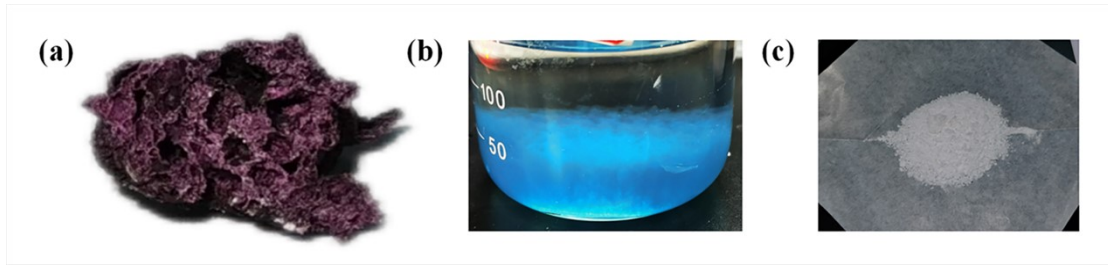

**Fig. S2.** Physical picture of (a) the sample after urea-assisted sulfation roasting;  
(b) the precipitated  $\text{CoCO}_3$ ; (c) the concentrated precipitated  $\text{Li}_2\text{CO}_3$ .

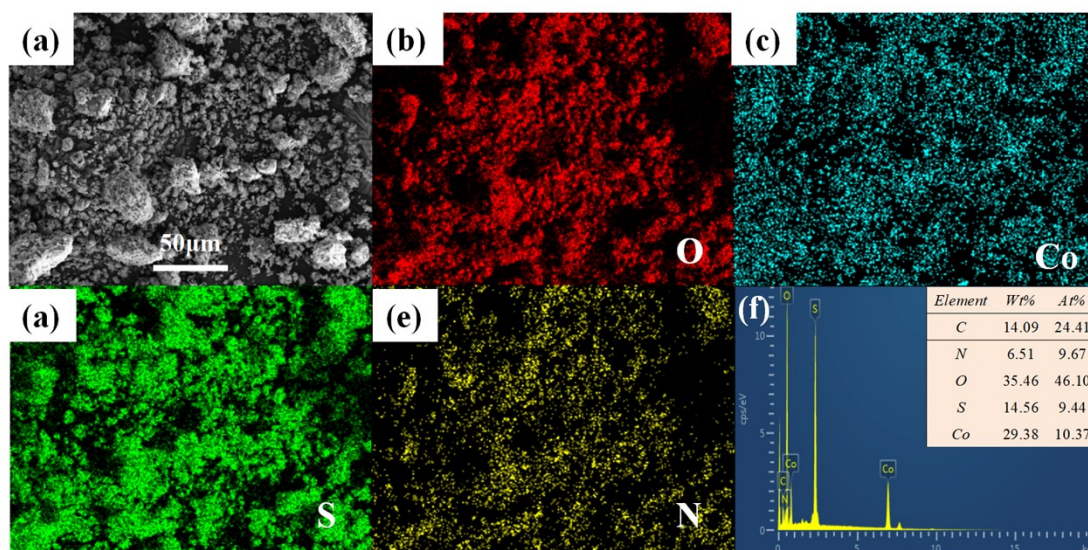

**Fig. S3.** SEM images of (a) roasted sample; (b-e) the corresponding EDS mapping and (f) content distribution for C, N, O, S and Co in roasted sample.

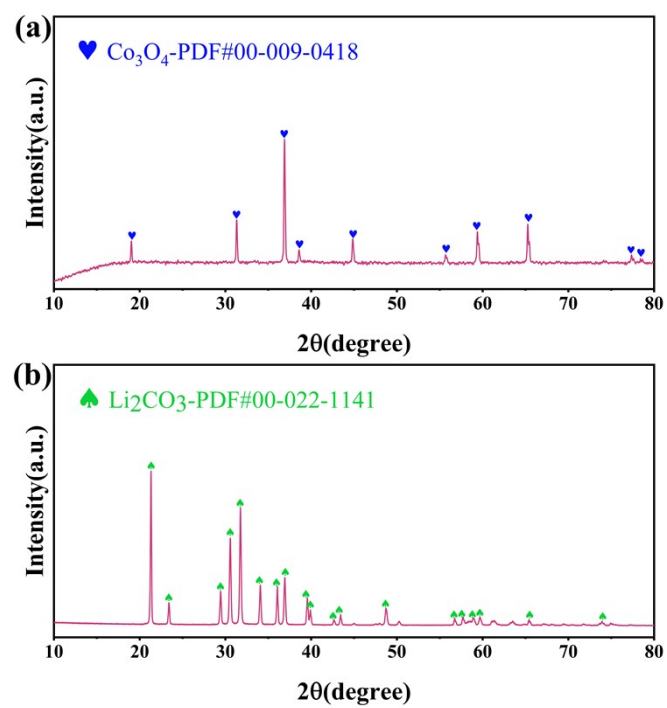

**Fig. S4.** XRD patterns of (a)  $\text{Co}_3\text{O}_4$  obtained by calcination; (b) concentrated and dried  $\text{Li}_2\text{CO}_3$ .

## Reference

- 1 J. Lin, C. Cui, X. Zhang, E. Fan, R. Chen, F. Wu and L. Li, *Journal of Hazardous Materials*, 2022, **424**, 127757.
- 2 J. Lin, E. Fan, X. Zhang, R. Chen, F. Wu and L. Li, *Advanced Energy Materials*, 2022, **12**, 2103288.
- 3 D. Wang, X. Zhang, H. Chen and J. Sun, *Minerals Engineering*, 2018, **126**, 28–35.
- 4 S. He, B. P. Wilson, M. Lundström and Z. Liu, *Journal of Cleaner Production*, 2020, **268**, 122299.
- 5 Y. Tang, B. Zhang, H. Xie, X. Qu, P. Xing and H. Yin, *Journal of Power Sources*, 2020, **474**, 228596.
- 6 Y. Tang, X. Qu, B. Zhang, Y. Zhao, H. Xie, J. Zhao, Z. Ning, P. Xing and H. Yin, *Journal of Cleaner Production*, 2021, **279**, 123633.
- 7 B. Zhang, X. Qu, X. Chen, D. Liu, Z. Zhao, H. Xie, D. Wang and H. Yin, *Journal of Hazardous Materials*, 2022, **424**, 127586.
